# Supplementary material for: Personalized Medicine in the U.S. and Germany: Awareness, Acceptance, Use and Preconditions for the Wide Implementation into the Medical Standard
Source: MDPI journal article supplement (doi:10.3390/jpm6020015), 2016-05-02
Supplement: s1 [file s1]

### Example: Questionnaire (U.S. Physician)

Have you heard about Personalized Medicine?

☐ Yes

☐ No

What are your associations with Personalized Medicine?

#### Have you heard about:

(multiple answers are possible)

Personalized drug ☐

Genetic test ☐

Protein test ☐

Personalized therapy ☐

Pharmacogenetic test ☐

|                          |                                                                                                                                           | 1<br>Strongly<br>disagree | 2<br>Disagree | 3<br>Neither<br>agree nor<br>disagree | 4<br>Agree | 5<br>Strongly<br>agree |
|--------------------------|-------------------------------------------------------------------------------------------------------------------------------------------|---------------------------|---------------|---------------------------------------|------------|------------------------|
| <b>General Questions</b> |                                                                                                                                           |                           |               |                                       |            |                        |
| 1                        | One-size-fits-all is not the best type of medication                                                                                      |                           |               |                                       |            |                        |
| 2                        | I am concerned about the side effects of drugs                                                                                            |                           |               |                                       |            |                        |
| 3                        | Based on Personalized Medicine approach it will be possible to deliver better medical care                                                |                           |               |                                       |            |                        |
| 4                        | Personalized Medicine will be standard practice in 5 years                                                                                |                           |               |                                       |            |                        |
| 5                        | Personalized Medicine is the medicine of the future                                                                                       |                           |               |                                       |            |                        |
| 6                        | Socio-political processes in the U.S. encourage the development of Personalized Medicine                                                  |                           |               |                                       |            |                        |
| 7                        | Patient involvement in the decisions about their own medical treatment must increase                                                      |                           |               |                                       |            |                        |
| 8                        | Amount of direct-to-consumer personalized drugs and genetic tests available online should increase                                        |                           |               |                                       |            |                        |
| 9                        | Direct-to-consumer personalized drugs and genetic tests available online should be prohibited                                             |                           |               |                                       |            |                        |
| 10                       | For genetic tests purchased online, the oversight of a clinician is not necessary                                                         |                           |               |                                       |            |                        |
| 11                       | All US States should agree on the regulations regarding ordering of tests                                                                 |                           |               |                                       |            |                        |
| 12                       | All US States should agree on the regulations regarding the involvement of medical professionals in the evaluation of genetic information |                           |               |                                       |            |                        |
| 13                       | The current U.S. government supports the development of Personalized Medicine                                                             |                           |               |                                       |            |                        |
| 14                       | Database(s) holding genetic information should be maintained by government.                                                               |                           |               |                                       |            |                        |
| 15                       | Genetic information should be stored in the central database                                                                              |                           |               |                                       |            |                        |
| 16                       | Database(s) holding genetic information should be private                                                                                 |                           |               |                                       |            |                        |

|                               |                                                                                                                   | 1<br>Strongly<br>disagree | 2<br>Disagree | 3<br>Neither<br>agree nor<br>disagree | 4<br>Agree | 5<br>Strongly<br>agree |
|-------------------------------|-------------------------------------------------------------------------------------------------------------------|---------------------------|---------------|---------------------------------------|------------|------------------------|
| 17                            | All types of laboratory tests should be reviewed by the FDA                                                       |                           |               |                                       |            |                        |
| 18                            | EHR (Electronic Health Record) and family medical history are suitable sources for storage of genetic information |                           |               |                                       |            |                        |
| <b>Professional Questions</b> |                                                                                                                   |                           |               |                                       |            |                        |
| 19                            | I prescribe/advice ...                                                                                            |                           |               |                                       |            |                        |
| a                             | Personalized drugs                                                                                                |                           |               |                                       |            |                        |
| b                             | Personalized therapies                                                                                            |                           |               |                                       |            |                        |
| c                             | Genetic tests                                                                                                     |                           |               |                                       |            |                        |
| d                             | Pharmacogenetic tests                                                                                             |                           |               |                                       |            |                        |
| e                             | Protein test                                                                                                      |                           |               |                                       |            |                        |
| 20                            | I have experience of analyzing the results of...                                                                  |                           |               |                                       |            |                        |
| a                             | Genetic test                                                                                                      |                           |               |                                       |            |                        |
| b                             | Pharmacogenetic test                                                                                              |                           |               |                                       |            |                        |
| c                             | Protein test                                                                                                      |                           |               |                                       |            |                        |
| 21                            | I plan to get some education/training for Personalized Medicine                                                   |                           |               |                                       |            |                        |
| 22                            | I am willing to pay for my Personalized Medicine training myself                                                  |                           |               |                                       |            |                        |
| 23                            | I have EHR (Electronic Health Records) and family histories of my patients                                        |                           |               |                                       |            |                        |
| <b>Financial Questions</b>    |                                                                                                                   |                           |               |                                       |            |                        |
| 24                            | With Personalized Medicine the amount of hospitalization days will be reduced                                     |                           |               |                                       |            |                        |
| 25                            | Personalized drugs are more effective than standard drugs                                                         |                           |               |                                       |            |                        |
| 26                            | Side effects of personalized drugs are lower than that of standard drugs                                          |                           |               |                                       |            |                        |
| 27                            | Personalized drugs are less expensive than standard drugs                                                         |                           |               |                                       |            |                        |
| 28                            | It is less expensive to develop personalized drugs than standard drugs                                            |                           |               |                                       |            |                        |
| 29                            | Personalized Medicine can help society to save money                                                              |                           |               |                                       |            |                        |
| 30                            | Personalized Medicine should be covered by health insurance                                                       |                           |               |                                       |            |                        |
| 31                            | Medicare and Medicaid should cover the costs of Personalized Medicine                                             |                           |               |                                       |            |                        |
| 32                            | The patient should pay out-of-pocket to cover the costs of Personalized Medicine                                  |                           |               |                                       |            |                        |

|                                      |                                                                                                         | 1<br>Strongly<br>disagree | 2<br>Disagree | 3<br>Neither<br>agree nor<br>disagree | 4<br>Agree | 5<br>Strongly<br>agree |
|--------------------------------------|---------------------------------------------------------------------------------------------------------|---------------------------|---------------|---------------------------------------|------------|------------------------|
| <b>Questions About Data Security</b> |                                                                                                         |                           |               |                                       |            |                        |
| 33                                   | Exchange of biological samples and genetic data in the U.S. is secure                                   |                           |               |                                       |            |                        |
| 34                                   | Patients should have access to their genetic information                                                |                           |               |                                       |            |                        |
| 35                                   | Health insurer for life, disability and long-term care should be allowed to require genetic information |                           |               |                                       |            |                        |
| 36                                   | Health insurance companies should have access to genetic information                                    |                           |               |                                       |            |                        |
| 37                                   | Employers should have access to genetic information of their employees                                  |                           |               |                                       |            |                        |
| 38                                   | I have a concern about the security of genetic data use                                                 |                           |               |                                       |            |                        |
| 39                                   | I surf the internet every day                                                                           |                           |               |                                       |            |                        |

Where is the data about pharmacogenetic, genetic and protein tests stored now?

---

Acceptable price difference between daily dose of standard and personalized drug is: \$/%\_\_\_\_\_

Acceptable price difference between treatment with standard and personalized therapy per day is:  
\$/%\_\_\_\_\_

**Acceptable price for**

Genetic test is: \$ \_\_\_\_\_

Pharmacogenetic test is: \$ \_\_\_\_\_

Protein test is: \$ \_\_\_\_\_

**Comment:**

---



---

**Additional Information:**

Gender: Male ☐ Female ☐

Age: 20-30 ☐ 41-50 ☐ 61-70 ☐  
31-40 ☐ 51-60 ☐ over 70 ☐

Medical specialization: \_\_\_\_\_

I am currently working at: hospital ☐ medical centre ☐ other ☐  
clinic ☐ medical practice ☐

### Example: Questionnaire (U.S. Public)

Have you heard about Personalized Medicine?

☐ Yes

☐ No

What are your associations with Personalized Medicine?

#### Have you heard about:

(multiple answers are possible)

Personalized drug ☐

Personalized therapy ☐

Genetic test ☐

Pharmacogenetic test ☐

Protein test ☐

#### Have you already had:

(multiple answers are possible)

Personalized drug ☐

Personalized therapy ☐

Genetic test ☐

Pharmacogenetic test ☐

Protein test ☐

|                          |                                                                                                                                           | 1<br>Strongly<br>disagree | 2<br>Disagree | 3<br>Neither<br>agree nor<br>disagree | 4<br>Agree | 5<br>Strongly<br>agree |
|--------------------------|-------------------------------------------------------------------------------------------------------------------------------------------|---------------------------|---------------|---------------------------------------|------------|------------------------|
| <b>General Questions</b> |                                                                                                                                           |                           |               |                                       |            |                        |
| 1                        | One-size-fits-all is not the best type of medication                                                                                      |                           |               |                                       |            |                        |
| 2                        | I am concerned about the side effects of drugs                                                                                            |                           |               |                                       |            |                        |
| 3                        | Based on Personalized Medicine approach it will be possible to deliver better medical care                                                |                           |               |                                       |            |                        |
| 4                        | Personalized Medicine will be standard practice in 5 years                                                                                |                           |               |                                       |            |                        |
| 5                        | Personalized Medicine is the medicine of the future                                                                                       |                           |               |                                       |            |                        |
| 6                        | Socio-political processes in the U.S. encourage the development of Personalized Medicine                                                  |                           |               |                                       |            |                        |
| 7                        | Patient involvement in the decisions about their own medical treatment must increase                                                      |                           |               |                                       |            |                        |
| 8                        | Amount of direct-to-consumer personalized drugs and genetic tests available online should increase                                        |                           |               |                                       |            |                        |
| 9                        | Direct-to-consumer personalized drugs and genetic tests available online should be prohibited                                             |                           |               |                                       |            |                        |
| 10                       | For genetic tests purchased online, the oversight of a clinician is not necessary                                                         |                           |               |                                       |            |                        |
| 11                       | All US States should agree on the regulations regarding ordering of tests                                                                 |                           |               |                                       |            |                        |
| 12                       | All US States should agree on the regulations regarding the involvement of medical professionals in the evaluation of genetic information |                           |               |                                       |            |                        |
| 13                       | The current U.S. government supports the development of Personalized Medicine                                                             |                           |               |                                       |            |                        |
| 14                       | Database(s) holding genetic information should be maintained by government.                                                               |                           |               |                                       |            |                        |

|                                      |                                                                                                                   | 1<br>Strongly<br>disagree | 2<br>Disagree | 3<br>Neither<br>agree nor<br>disagree | 4<br>Agree | 5<br>Strongly<br>agree |
|--------------------------------------|-------------------------------------------------------------------------------------------------------------------|---------------------------|---------------|---------------------------------------|------------|------------------------|
| 15                                   | Genetic information should be stored in the central database                                                      |                           |               |                                       |            |                        |
| 16                                   | Database(s) holding genetic information should be private                                                         |                           |               |                                       |            |                        |
| 17                                   | All types of laboratory tests should be reviewed by the FDA                                                       |                           |               |                                       |            |                        |
| 18                                   | EHR (Electronic Health Record) and family medical history are suitable sources for storage of genetic information |                           |               |                                       |            |                        |
| <b>Professional Questions</b>        |                                                                                                                   |                           |               |                                       |            |                        |
| 19                                   | I like to buy personalized drugs and tests on the internet                                                        |                           |               |                                       |            |                        |
| 20                                   | I have access to my EHR (Electronic Health Record) and family medical history                                     |                           |               |                                       |            |                        |
| <b>Financial Questions</b>           |                                                                                                                   |                           |               |                                       |            |                        |
| 21                                   | With Personalized Medicine the amount of hospitalization days will be reduced                                     |                           |               |                                       |            |                        |
| 22                                   | Personalized drugs are more effective than standard drugs                                                         |                           |               |                                       |            |                        |
| 23                                   | Side effects of personalized drugs are lower than that of standard drugs                                          |                           |               |                                       |            |                        |
| 24                                   | Personalized drugs are less expensive than standard drugs                                                         |                           |               |                                       |            |                        |
| 25                                   | It is less expensive to develop personalized drugs than standard drugs                                            |                           |               |                                       |            |                        |
| 26                                   | Personalized Medicine can help society to save money                                                              |                           |               |                                       |            |                        |
| 27                                   | Personalized Medicine should be covered by health insurance                                                       |                           |               |                                       |            |                        |
| 28                                   | Medicare and Medicaid should cover the costs of Personalized Medicine                                             |                           |               |                                       |            |                        |
| 29                                   | The patient should pay out-of-pocket to cover the costs of Personalized Medicine                                  |                           |               |                                       |            |                        |
| <b>Questions About Data Security</b> |                                                                                                                   |                           |               |                                       |            |                        |
| 30                                   | Exchange of biological samples and genetic data in the U.S. is secure                                             |                           |               |                                       |            |                        |
| 31                                   | Patients should have access to their genetic information                                                          |                           |               |                                       |            |                        |
| 32                                   | Health insurer for life, disability and long-term care should be allowed to require genetic information           |                           |               |                                       |            |                        |
| 33                                   | Health insurance companies should have access to genetic information                                              |                           |               |                                       |            |                        |
| 34                                   | Employers should have access to genetic information of their employees                                            |                           |               |                                       |            |                        |
| 35                                   | I have a concern about the security of genetic data use                                                           |                           |               |                                       |            |                        |
| 36                                   | I surf the internet every day                                                                                     |                           |               |                                       |            |                        |

Acceptable price difference between daily dose of standard and personalized drug is: \$/% \_\_\_\_\_

Acceptable price difference between treatment with standard and personalized therapy per day is:  
\$/% \_\_\_\_\_

**Acceptable price for**

Genetic test is: \$ \_\_\_\_\_

Pharmacogenetic test is: \$ \_\_\_\_\_

Protein test is: \$ \_\_\_\_\_

**Comment:**

---

---

**Additional Information:**

Gender: Male ☐ Female ☐

Age: 20-30 ☐ 41-50 ☐ 61-70 ☐  
31-40 ☐ 51-60 ☐ over 70 ☐

I am currently: Student ☐ Employee ☐ Pensioner ☐  
University lecturer ☐ Non-employee ☐

I am under medical treatment of: cancer ☐ asthma ☐ other ☐  
diabetes ☐ depression ☐ none ☐

My healthcare expenses are myself ☐ health insurance ☐  
covered by: Medicare and Medicaid ☐ other ☐

Of all my health expenses my 30% ☐ 80% ☐  
health insurance covers: 50% ☐ 100% ☐
